1                                    **Octopamine affects gustatory responsiveness**  
2                                    **and associative learning performance in bumble bees**

3

4    **Short title:** Octopamine effects on bumble bee behavior

5    **Authors:** Felicity Muth<sup>1\*</sup>, Emily Breslow<sup>2</sup>, Anne S. Leonard<sup>2</sup>

6

7    **Affiliations:**

8            <sup>1</sup>Department of Integrative Biology, University of Texas at Austin; Austin, Texas 78712,  
9            USA.

10           <sup>2</sup>Department of Biology, University of Nevada, Reno; Reno, Nevada 89557, USA.

11           \*Corresponding author. Email: [felicity.muth@austin.utexas.edu](mailto:felicity.muth@austin.utexas.edu)

12           ORCID ID: 0000-0003-0904-0589

13

14

15 **Abstract**

16 Octopamine has broad roles within invertebrate nervous systems as a neurohormone,  
17 neurotransmitter and neuromodulator. It orchestrates foraging behavior in many insect taxa via  
18 effects on feeding, gustatory responsiveness and appetitive learning. Knowledge of how this  
19 biogenic amine regulates bee physiology and behavior is based largely on study of a single  
20 species, the honey bee, *Apis mellifera*. Until recently, its role in the foraging ecology and social  
21 organization of diverse bee taxa had been unexplored. Bumble bees (*Bombus* spp.) are a model  
22 for the study of foraging and learning, and its neural basis, but whether octopamine similarly  
23 affects sensory and cognitive performance in this genus is not known. To address this gap, we  
24 explored the effects of octopamine on sucrose response thresholds and associative learning in  
25 *Bombus impatiens* via conditioning of the Proboscis Extension Reflex (PER) using a visual  
26 (color) cue. We found that octopamine had similar effects on bumble bee behavior as honey  
27 bees, however, higher doses were required to induce these effects. At this higher dose,  
28 octopamine lowered bees' sucrose response thresholds and appeared to enhance associative  
29 learning performance. Adding to recent studies on stingless bees (Meliponini), these findings  
30 support the idea that octopamine's role in reward processing and learning is broadly conserved  
31 across Apidae, while pointing towards some differences across systems worth exploring further.

32

33 **Keywords:** biogenic amines, foraging, sensory processing, *Bombus impatiens*, bees, color

34

35

36

## 37 **Introduction**

38 Octopamine (OA) is a biogenic amine involved in a diverse suite of physiological processes in  
39 insects (Roeder, 1994; Roeder, 1999). In honey bees (*Apis mellifera*) it may influence  
40 phenomena as diverse as circadian and cardiac rhythms (Bloch and Meshi, 2007; Papaefthimiou  
41 and Theophilidis, 2011), the stress response (Harris and Woodring, 1992) and motor  
42 performance (Fussnecker et al., 2006). However its clearest role is in the nervous system where it  
43 mediates sensory and cognitive processes associated with feeding (Giurfa, 2006; Rein et al.,  
44 2013). Alongside other biogenic amines (e.g. Dopamine (DA) and Tyramine (TA), OA's  
45 precursor), OA has well-established effects on sensory responsiveness (Barron et al., 2002;  
46 Scheiner et al., 2014; Schilcher et al., 2021), including responsiveness to sucrose (Pankiw and  
47 Page, 2003; Scheiner et al., 2002). These effects on gustatory responsiveness are in turn a key  
48 determinant of learning performance in a foraging context (Scheiner et al., 2001). OA is centrally  
49 involved in the reward pathways that underlie appetitive learning: its injection into brain regions  
50 involved in learning and memory substitutes for a reward in a PER (Proboscis Extension Reflex)  
51 conditioning paradigm (Hammer and Menzel, 1998; Riemensperger et al., 2005; Schwaerzel et  
52 al., 2003; Unoki et al., 2005). OA's heightened presence in the brains of starved foragers  
53 suggests that it also helps regulate the appetite—and perhaps more broadly, the motivation to  
54 learn—of workers in a feeding context (Mayack et al., 2019), (see also Akülkü et al., 2021).

55         These effects of OA on individual *A. mellifera* behavior may scale up to influence the  
56 division of labor and collective foraging efforts more generally (Wagener-Hulme et al., 1999).  
57 OA receptor expression in the brains of nurses vs. foragers differs (Reim and Scheiner, 2014;  
58 Schulz and Robinson, 2001), as do OA titers (Schulz et al., 2002). Among foragers, patterns of  
59 OA receptor expression change with age (Peng et al., 2021) and OA-mediated differences may

60 underlie individual-level patterns of resource specialization (Arenas et al., 2021; Giray et al.,  
61 2007). For example, OA's influence on sucrose response thresholds determines the quality of  
62 food they bring back when foraging (Giray et al., 2007; Pankiw and Page Jr., 1999). Pollen  
63 foragers have lower sucrose response thresholds and as such are less discriminating in the nectar  
64 they will accept compared to nectar foragers (Page Jr et al., 1998; Scheiner et al., 2001). OA also  
65 mediates social transmission of information about food resources: for example, bees treated with  
66 OA over-represent the quality of the forage they encounter when communicating with nestmates  
67 via their 'dance language' (Barron et al., 2007). Interestingly, OA affects dances for both pollen  
68 and nectar quality in the same way, indicating that it plays a role in reward processing more  
69 broadly, and thus has an role equivalent to the dopaminergic system in mammals (Wise, 2004).

70         Given how clearly OA is involved in the regulation of individual and colony-level  
71 foraging behavior in *A. mellifera*, what role does it play for other bees? A 2022 Web of Science  
72 search of the scientific literature for "octopamine + bee" confirmed that while honey bees have  
73 historically offered a tractable model for untangling complex relationships between aminergic  
74 systems, individual physiology and collective behavior, other taxa are rarely considered (Fig. 1).  
75 Perhaps this reflects the assumption that OA's involvement in these sensory and neural processes  
76 are so fundamental that they must be broadly conserved, though recent reviews highlight the  
77 need for more information across species (rev. Kamhi et al. 2017; Sasaki et al. 2021). Indeed, a  
78 recent study of the closely-related TA signaling system pointed towards a shared neural  
79 expression of TA receptors among representatives of Apini, Bombini, Meliponini, and Osmiini  
80 (Thamm et al., 2021), although behavioral data is needed to confirm if similar expression  
81 patterns relate to similar functionality. Likewise, behavioral work on stingless bees points to a  
82 conserved effect of OA on sucrose responsiveness and foraging behavior: *Melipona scutellaris*

83 fed OA had a lower sucrose reponse threshold (Mc Cabe et al., 2017), and *Plebia droryana*  
84 foraged on a sucrose feeder containing OA at a faster rate compared to their behavior at a control  
85 feeder (Peng et al., 2020).

86 On the other hand, recent comparative work has also revealed intriguing potential for  
87 differences in aminergic pathways. Thamm et al.'s (2021) study noted genus-level differences in  
88 the expression patterns of a tyramine receptor (AmTAR1) within the optic lobes. Likewise,  
89 within honey bees, OA receptor SNPs were associated with different ecotypes raising the  
90 prospect of their role in adaption to elevation-specific foraging ecologies (Wallberg et al., 2017).  
91 Given variation in bee sociality, dietary specialization and life histories (often involving both  
92 social and solitary foraging phases), exploring whether the behavioral effects of OA that are  
93 most established in *A. mellifera* manifest in other species will help fill in the picture of how this  
94 appetitive system supports diverse foraging behaviors across the bee tree of life.

95 Bumble bees (*Bombus*) are an important model for the study of insect cognition and  
96 foraging behavior (Chittka and Thomson, 2001). Like *Apis*, *Bombus* are generalist foragers that  
97 visit a variety of flowers when foraging, and as such must rapidly discriminate between floral  
98 rewards (e.g. nectars differing in sucrose concentration) and learn which flowers contain the  
99 highest quality rewards based on associated floral stimuli (color, scent etc.). Typically living as  
100 part of a colony, bumble bees communicate information about resource availability, albeit  
101 through chemical communication rather than a waggle dance (Dornhaus et al., 2003). Despite  
102 these shared features, bumble bees show a number of cognitive (Sherry and Strang, 2015), and  
103 neural (Gowda and Gronenberg, 2019) differences from honey bees. Given that individual  
104 *Bombus* workers are less specialized in their roles within the colony than in *Apis* and in their

105 collection of resources more generally (Goulson, 2003), OA's role in coordinating foraging-  
106 related behaviors is an open question.

107         Here we addressed the role of OA in bumble bee sensory responsiveness and cognition.  
108 Following a protocol similar to those used in the past with honey bees (Pankiw and Page, 2003;  
109 Scheiner et al., 2002) and stingless bees (*Melipona scutellaris*; Mc Cabe et al., 2017), we  
110 addressed how OA affected sucrose responsiveness and learning of a visual association in  
111 bumble bees *B. impatiens*. If OA has a similar role in bumble bees as it does in honey bees and  
112 stingless bees, then we expected its ingestion to lower sucrose response thresholds and enhance  
113 appetitive learning in a dose-dependent manner.

114

## 115 **Methods**

### 116 *General methods*

117 In all experiments we used *Bombus impatiens* workers (Experiment 1 n=65; Experiment 2 n =  
118 56) purchased from Koppert Biological Systems (Howell, MI, U.S.A.). To obtain individuals for  
119 testing, we used an insect aspirator to remove bees from wicked feeders (Exp. 1: 30% (w/w)  
120 sucrose; Exp. 2: 15% (w/w) sucrose) in a central foraging arena (L × W × H: 100×95×90 cm)  
121 which had 3-5 colonies attached at any one time. We supplemented colonies with 5g of honey  
122 bee pollen (Koppert Biological Systems, Howell, MI, U.S.A.) every two to three days.

123         Following Riveros and Gronenberg (2009) and Riveros et al. (2020), we cooled bees in  
124 plastic vials placed on ice to immobilize them. Bees were then placed into individual plastic  
125 tubes (modified 1000 µl pipette tips, Fig. 2a) and restrained with two metal insect pins forming a  
126 “yoke” between their head and thorax that was secured with tape to the plastic tube (as in Muth

127 et al., 2015; Riveros and Gronenberg, 2009). The bee could extend its proboscis and move its  
128 antennae but was otherwise immobilized. Bees were left to acclimate for three hours at room  
129 temperature in a dark room. After this time, we screened bees for responsiveness by presenting a  
130 droplet of 30% (w/w) sucrose to their antennae; bees that did not exhibit PER were removed  
131 from the experiment.

132 All experiments were conducted in a dark room, illuminated only with a red light to  
133 reduce any additional visual stimuli that could influence responsiveness or learning. Likewise, in  
134 all experiments, we fed bees OA, rather than injecting it. At least in honey bees, oral  
135 consumption has similar effects to injection but is less invasive (Barron, Schulz, & Robinson,  
136 2002; Pankiw & Page, 2003)).

137 All statistical analyses were performed in R version 4.1.2 (2021) (R Core Team, 2020). We  
138 carried out GLMMs using the glmer function in the lme4 package; (Bates et al., 2015), including  
139 “bee” as a random factor to control for the multiple measures per bee. To determine the  
140 significance of interaction effects, we ran models with and without the interactions and used the  
141 anova() function to compare the fit of models using AICs. We carried out post-hoc tests using  
142 the emmeans package (Lenth 2017) and visualized relationships using effects() (Fox 2003).

143

#### 144 *Experiment 1: Does OA affect gustatory responsiveness in bumble bees?*

145 To determine whether OA affected sucrose response thresholds, we assigned bees randomly to  
146 one of three treatments that varied in the solution they were fed prior to testing. In all treatments,  
147 we used a Hamilton syringe to feed bees 10µl of 30% (w/w) sucrose containing 1) 0µg/µl **OA**  
148 (control); 2) 2µg/µl **OA**; or 3) 8µg/µl **OA** (sample sizes in Fig. 3). After feeding bees, we

149 allowed them to sit for 30 minutes to allow full absorption of the **OA** (Pankiw & Page, 2003).  
150 All three treatments were represented on a given day.

151 We tested the sucrose responsiveness of all bees by presenting them with eight different  
152 concentrations (w/w) of sucrose solution in succession (0.01%, 0.03%, 0.1%, 0.3%, 1%, 3%,  
153 10%, 30%, 50%), with a presentation of water between each sucrose presentation (as in McCabe  
154 et al., 2017; Pankiw and Page, 2003). As in these previous studies, presentation of water allowed  
155 us to distinguish a possible increase in sucrose responsiveness from a generalized increase in  
156 responsiveness to all stimuli. For each water trial, we presented the liquid to the bees' antennae  
157 and allowed them three seconds to respond, before presenting them with the sucrose solution,  
158 and again giving them three seconds to respond. The inter-trial-interval between each sucrose  
159 presentation was 5 minutes.

160

### 161 *Experiment 1 Data Analysis*

162 To determine whether bees assigned to the three pre-treatments differed in their responsiveness  
163 to sucrose, we carried out a binomial GLMM with the binary response variable of whether the  
164 bee responded or not (1/0) and the following explanatory variables: sucrose concentration  
165 (continuous), treatment (3 levels) and the random factor "bee". We initially planned to use a  
166 similar model to compare responsiveness to water, but due to the large number of bees not  
167 responding at all to this stimulus, we just compared the first water trial where there was the  
168 greatest response using a binomial linear model with the response variable responded or not  
169 (0/1).

170



171 *Experiment 2: Does OA affect visual learning in bumble bees?*

172 We harnessed 56 bees and trained and tested them using the proboscis extension response (PER)  
173 protocol. Bees were randomly assigned to two treatments, and fed prior to training 10 $\mu$ l of 30%  
174 (w/w) sucrose containing either 1) 0 $\mu$ g/ $\mu$ l **OA** (control; n=28) or 2) 8 $\mu$ g/ $\mu$ l **OA** (treatment;  
175 n=28). This dose was informed by our findings from Experiment 1. After being fed, individuals  
176 were transferred to the PER training apparatus and left to sit for 30 minutes before undergoing  
177 training and testing. Bees from both treatment groups were represented equally on each testing  
178 day.

179 The PER training apparatus consisted of a circular rotating platform suspended above the  
180 tabletop (Fig. 2a). Twelve ‘training chambers’ created from plastic cylinders were glued to the  
181 underside of this platform, approx. 6 cm apart. An opening (w $\times$ h: 3cm $\times$ 1.5cm) in each training  
182 chamber allowed experimental access to the harnessed bee. Apart from a thin platform  
183 supporting the harnessed bee, the underside of each training chamber was open, allowing light to  
184 enter in from below (on which three blue ( $\lambda$ =470 nm) LED lights were mounted). Each chamber  
185 was lined with aluminum foil to evenly disperse lights which were controlled via a switchboard.

186 In an absolute conditioning paradigm, each bee was given 11 training trials followed by a  
187 test trial. Each training trial consisted of a presentation of the conditioned stimulus (blue light),  
188 followed by the unconditioned stimulus (30% (w/w) sucrose). In the initial trials, we exposed a  
189 bee to the light stimulus for 10 seconds before presenting the bee with the sucrose reward for an  
190 additional five seconds (2 seconds to antennae, 3 seconds to proboscis) (Fig. 2b). After the bee  
191 showed a conditioned response, the reward was presented (for 3 seconds) as soon as the bee  
192 extended its proboscis (even if 10 seconds had not elapsed). In all cases the reward and stimulus  
193 were removed simultaneously. As in Exp. 1, we used an inter-trial-interval of 5 minutes. The test

194 trial was the same as the training trials with the exception that the blue light stimulus was given  
195 without the reward. In all learning and test trials we recorded (via live observation) whether the  
196 individual bee extended its proboscis in response to the blue light, and in cases when they did not  
197 but were presented with a reward (i.e. during the learning trials), if they responded to the  
198 presentation of the reward. This allowed us to not only determine if learning performance  
199 differed between the treatment groups but also if overall tendency to respond to sucrose  
200 presentation also differed.

201

## 202 *Experiment 2 Data Analysis*

203 If a bee did not exhibit a proboscis extension to presentation of the sucrose reward more than 4  
204 times across the 11 training trials then we considered it to be unresponsive and excluded it from  
205 further analysis (OA n=1; control n=5), resulting in final sample sizes of OA n=27 and control  
206 n=23. To analyze whether bees learned differently across trials on the basis of treatment, we  
207 carried out binomial GLMMs where the response variable was whether the bee responded to the  
208 light stimulus or not (0/1) prior to receiving a reward, and the explanatory variables included  
209 were trial, treatment, and the random factor bee. Because both groups showed evidence of  
210 learning initially but then a decline in after trial 6, we split the data into two models: trials 1-6  
211 and trials 7-11. The test trial data were analyzed alone using a binomial GLM.

212 To address whether feeding motivation/ responsiveness varied across trials we also  
213 carried out models, this time using all 56 bees tested. We included the response variable of  
214 whether the bee responded to the sucrose or not once it was presented to them (0/1) and the same

215 explanatory variables as above. Interactions between trial and treatment were always included  
216 initially, but excluded if non-significant.

217

## 218 **Results**

### 219 *Experiment 1: Does OA affect gustatory responsiveness?*

220 Bees that were pre-fed the higher dose of **OA** were more responsive to sucrose than both the  
221 control and lower-dose treatment, which did not differ to each other (comparison of models with  
222 and without treatment  $\times$  concentration interaction:  $\chi^2_2 = 6.830$ ;  $p = 0.033$ ; Tukey post-hoc  
223 comparison between treatments: control vs. low:  $z = 0.761$ ,  $p = 0.727$ ; control vs. high:  $z = 4.713$ ,  
224  $p < 0.0001$ ; low vs. high:  $z = -4.302$ ;  $p = 0.0001$ ; Fig. 3a).

225 Similarly, in the first water trial, bees assigned to the high-dose pre-treatment were more  
226 responsive than the control group ( $z = 2.408$ ,  $p = 0.016$ ; Fig. 3b) while the bees that were pre-fed  
227 the lower dose of OA did not differ from the control bees ( $z = 0.103$ ;  $0.918$ ; Fig. 3b). After the  
228 first water trial, bees across all treatments rarely responded at all.

229

### 230 *Experiment 2: Does OA affect visual learning in bumble bees?*

#### 231 *Learning performance – response to the conditioned stimulus*

232 Across the first 6 learning trials, performance improved in both bees pre-treated with **OA** as well  
233 as in control bees ( $z = 4.731$ ,  $p < 0.0001$ ) but the **OA**-treated bees showed higher performance ( $z$   
234  $= -2.196$ ,  $p = 0.028$ ). From the 7<sup>th</sup> to 11<sup>th</sup> learning trial, performance declined in both groups and  
235 there was an interactive effect, where the OA-treated bees at first out-performed the control

236 group, but this effect disappeared towards the end of training (treatment  $\times$  trial:  $z = 2.021$ ;  $p =$   
237  $0.043$ ; trial  $z = -2.781$ ;  $p = 0.005$ ; treatment:  $z = -2.205$ ,  $p = 0.027$ ; Fig. 4a). There was no effect  
238 of treatment in the test phase ( $z = 0.167$ ;  $p = 0.867$ ), however overall response was very low by  
239 this point (Fig. 4a).

240

#### 241 *Responsiveness – response to the unconditioned stimulus*

242 To address whether bees' motivation to respond to the unconditioned stimulus (sucrose reward)  
243 varied across treatments, we compared whether bees in the OA-treated and control groups  
244 responded similarly once the sucrose reward was presented to them. Our results suggest that  
245 initially the motivation to feed dropped in the control treatment but remained in the OA  
246 treatment; however towards the end of the training period bees assigned to both treatments  
247 showed similarly low motivation to consume the sucrose reward (treatment  $\times$  trial:  $z = 2.444$ ;  $p =$   
248  $0.015$ ; trial  $z = -4.347$ ;  $p < 0.001$ ; treatment:  $z = -3.604$ ,  $p < 0.001$ ; Fig. 4b).

249

## 250 **Discussion**

251 Octopamine (OA) has long been known to play an important role in honey bees (rev. Giurfa,  
252 2006; Roeder, 1999), a system often used as a model to study the neural basis of behavior  
253 (Menzel, 2012) and the physiological mechanisms of task specialization (Riveros and  
254 Gronenberg, 2010). Yet, how OA affects behavior and physiology in other bee taxa exhibiting  
255 different levels of sociality (e.g. Halictidae: Jeanson et al., 2008; Smith et al., 2019); (*Ceratina*:  
256 Cook et al., 2019) is only beginning to be explored (Fig. 1). Our understanding of how OA  
257 mediates collective foraging in other social bees (e.g. Meliponinae; Mc Cabe et al., 2017; Peng et

258 al., 2020) is equally limited. Within *Bombus*, only five prior studies have, to our knowledge,  
259 directly measured or manipulated OA. Four of these involve measuring OA levels or related  
260 gene expression with the aim of understanding reproductive division of labor: Bloch et al.  
261 (2000) found that OA titers in *Bombus terrestris* correlated with the dominance status of  
262 workers, independent of age or ovarian development; more recently Sasaki et al. measured OA  
263 levels in *Bombus ignitus* queens at different reproductive stages (Sasaki et al., 2017) or across  
264 workers vs. queens (Sasaki et al., 2021). Besides the present study, the only other experiment on  
265 *Bombus* that considers OA's role in a foraging context appears to be Cnaani et al. (2003) which  
266 asked whether OA altered floral choice in *B. impatiens*. This experiment used a free-flying assay  
267 with automatically refilling artificial flowers to show that the presence of OA in "nectar"  
268 impacted *B. impatiens* workers' persistence visiting a food source that became unrewarding.  
269 Although these results have intriguing implications for understanding how nectar chemistry  
270 might activate octopaminergic pathways (Muth et al., 2022), this experiment was not designed to  
271 identify the mechanism behind shifts in floral choice. Indeed, understanding how OA (or other  
272 biogenic amines) influences foraging behavior in diverse bee taxa will require standardized and  
273 replicable behavioral assays. To this end, we adapted two protocols that have long been widely  
274 used to study the effects of OA on honey bee (and recently, stingless bee) learning. Using these,  
275 we found that OA has an analogous effect on bumble bees as in these two other genera, lowering  
276 sucrose response thresholds and enhancing associative learning. Our results indicate that similar  
277 mechanisms may underlie appetitive learning within Apidae, but also highlight differences that  
278 may inform future work in this and other systems.

279 Our first experiment explored how consumption of OA at two concentrations affected  
280 bees' responsiveness to water and sucrose solutions. Broadly in keeping with work on honey

281 bees, we report the first evidence that OA consumption increases sucrose responsiveness in  
282 *Bombus*. As in *Apis*, effects were dose-dependent: bees fed a higher dose of 10 $\mu$ l of 8 $\mu$ g/  $\mu$ l  
283 (80 $\mu$ g total) were more responsive to sucrose across nearly all concentrations, and initially more  
284 responsive to water. Our lower-dose treatment (10 $\mu$ l of 2 $\mu$ g/  $\mu$ l = 20 $\mu$ g total) were not more  
285 responsive to either stimulus type than the control bees pre-fed a control sucrose solution.  
286 Scheiner et al., (2002) assayed honey bees using a similar method and found analogous dose-  
287 dependency. In contrast to our findings with *Bombus*, honey bees in this previous work  
288 demonstrated a heightened sucrose responsiveness following exposure to much lower doses of  
289 OA (1.9 and 9 $\mu$ g). In a second study of OA's effects on honey bees, increased sucrose  
290 responsiveness occurred following doses of 0.2, 2.0 and 20  $\mu$ g (Pankiw and Page, 2003). In  
291 stingless bees, Mc Cabe et al. (2017) compared the sucrose responsiveness of bees following  
292 doses of 9.5, 19, and 38  $\mu$ g OA and reported effects at the lowest doses as well. These  
293 differences in effectiveness of the lowest doses are unlikely to be due to differences in protocol,  
294 since in all these studies bees were immobilized and responsiveness was measured in a similar  
295 fashion. Without further data we cannot identify the source of this discrepancy. Body size is  
296 certainly a plausible explanation, but more subtle differences—for example, differences in  
297 receptor type or density—cannot be ruled out. As Mc Cabe et al (2017) noted, when OA is  
298 consumed by honey bees its behavioral effects are clear but their etiology is not: OA might  
299 change brain titers directly, or via more complex signaling cascades (as Scheiner et al, 2017  
300 showed for TA). In addition to the dose difference noted here, discrepancies between *A.*  
301 *mellifera* and stingless bees in the timing of OA-enhanced sucrose responsiveness were noted by  
302 Mc Cabe et al (2017) raising the prospect that OA may exert its effects on sucrose  
303 responsiveness differently across taxa.

304           Also in keeping with previous findings from honey bees, we found that when we used  
305 the higher dose of OA (80µg) in Experiment 2, pre-consumption of OA enhanced learning  
306 performance, at least during the acquisition phase. While the PER protocol carries the advantage  
307 of being able to tightly control stimulus and reward presentation, it is limited in that the only  
308 behavior that is recorded is the bees' tendency to extend its proboscis, which can be confounded  
309 with factors aside from learning and memory (rev. Muth et al., 2017). Several mechanisms could  
310 thus give rise to this effect. First, although we attempted to control for motivational effects by  
311 removing bees that did not respond to sucrose before starting the learning trials and by excluding  
312 bees that did not respond to sucrose more than 4 times across the 11 trials, there were still clear  
313 differences in motivation between the two groups (Fig. 4b). Namely, over the course of all trials,  
314 OA-fed bees were more likely to extend their proboscis to consume the sucrose reward than  
315 control bees (i.e. they showed a differential response to the unconditioned stimulus). As such, the  
316 differences seen between the treatments in bees' tendency to extend their proboscis towards the  
317 conditioned stimulus may reflect motivational differences as much as differences in learning  
318 aptitude.

319           Work from honey bees also suggested that OA may have had the capacity to affect  
320 sensory responsiveness to features of both the unconditioned stimulus (US+) and conditioned  
321 stimulus (CS+) in ways that could promote learning performance. For example, given that Exp. 1  
322 established clear effects on sucrose responsiveness, bees in the treated group might have  
323 perceived the value of the US+ as higher value than control bees, a feature that can boost  
324 learning performance. It is also possible that OA's ability to increase visual responsiveness  
325 (Scheiner et al. 2014) rendered the CS+ more salient to OA-dosed subjects in some way. Further  
326 work would be required to pinpoint the driver/s of the apparent performance difference we

327 detected. Going forward, the effects of OA on learning and memory in bumble bees may be  
328 better addressed in protocols where bees are free-moving and where motivation vs. learning can  
329 be more easily differentiated (e.g. as in Muth and Leonard, 2019). While data collected similarly  
330 on this apparatus did not detect changes in responses through 8 training trials (Riveros et al.,  
331 2020) clearly our bees' participation dropped markedly after the 6<sup>th</sup> trial, due to satiation, fatigue,  
332 or other unknown factors. This led to few responses to the conditioned stimulus in the test phase  
333 across both groups, making them difficult to compare and likely obscuring any potential  
334 differences.

335

## 336 **Conclusion**

337 Following OA consumption, results found in *Bombus* mirror those reported in *Apis* and  
338 *Meliponinae* in relation to sucrose responsiveness (both genera) and learning performance  
339 generally (which has only been measured in *Apis*). Yet, we did note some differences—namely,  
340 *Bombus* workers were not affected by our lower dose of OA, which work on the two other  
341 genera would have predicted to increase sucrose responsiveness. While subtle differences in OA-  
342 mediated behavior may not be significant for understanding broad patterns of aminergic-  
343 mediated social organization, we believe they are worth noting for two reasons. First, small  
344 changes in appetitive signaling pathways could be meaningful for understanding mechanisms  
345 involved in ecological radiation (Ji et al., 2020; Pankiw, 2003) as OA is clearly involved in  
346 determining what bees choose to collect and their motivation to do so. Secondly, many popular  
347 pesticides target OA receptors (Ahmed and Vogel, 2020; Farooqui, 2013; Papaefthimiou et al.,  
348 2013) and the OA signaling pathway in particular has been implicated in mediating bees'  
349 responses to stress (Chen et al., 2008; Corby-Harris et al., 2020), pathogens and parasites



350 (Mayack et al., 2015; Spivak et al., 2003), and pollutants (Søvik et al., 2015). In an era of wild  
351 bee declines, understanding whether *A. mellifera* is indeed a representative model for  
352 anthropogenic influence on aminergic pathways more broadly is a pressing challenge.

353

354

355

356

357

358

359

360 **References**

- 361 **Ahmed, M. A. I. and Vogel, C. F. A.** (2020). The synergistic effect of octopamine receptor  
362 agonists on selected insect growth regulators on *Culex quinquefasciatus* Say (Diptera:  
363 Culicidae) mosquitoes. *One Heal.* **10**, 100138.
- 364 **Akülkü, İ., Ghanem, S., Filiztekin, E., Suwannapong, G. and Mayack, C.** (2021). Age-  
365 Dependent Honey Bee Appetite Regulation Is Mediated by Trehalose and Octopamine  
366 Baseline Levels. *Insects* **12**, 863.
- 367 **Arenas, A., Lajad, R., Peng, T., Grüter, C. and Farina, W.** (2021). Correlation between  
368 octopaminergic signalling and foraging task specialisation in honeybees. *Genes, Brain*  
369 *Behav.* **20**, e12718.
- 370 **Barron, A., Schulz, D. and Robinson, G.** (2002). Octopamine modulates responsiveness to  
371 foraging-related stimuli in honey bees (*Apis mellifera*). *J. Comp. Physiol. A Sensory,*  
372 *Neural, Behav. Physiol.* **188**, 603–610.
- 373 **Barron, A. B., Maleszka, R., Vander Meer, R. K. and Robinson, G. E.** (2007). Octopamine  
374 modulates honey bee dance behavior. *Proc. Natl. Acad. Sci.* **104**, 1703–1707.
- 375 **Bates, D., Mächler, M., Bolker, B. and Walker, S.** (2015). Fitting Linear Mixed-Effects  
376 Models Using lme4. *J. Stat. Softw.* **67**, 1–48.
- 377 **Bloch, G. and Meshi, A.** (2007). Influences of octopamine and juvenile hormone on locomotor  
378 behavior and period gene expression in the honeybee, *Apis mellifera*. *J. Comp. Physiol. A*  
379 **193**, 181–199.
- 380 **Bloch, G., Simon, T., Robinson, G. E. and Hefetz, A.** (2000). Brain biogenic amines and

- 381 reproductive dominance in bumble bees (*Bombus terrestris*). *J. Comp. Physiol. A Sensory,*  
382 *Neural, Behav. Physiol.* **186**, 261–268.
- 383 **Chen, Y., Hung, Y. and Yang, E.** (2008). Biogenic amine levels change in the brains of stressed  
384 honeybees. *Arch. Insect Biochem. Physiol.* **68**, 241–250.
- 385 **Chittka, L. and Thomson, J. D.** (2001). *Cognitive Ecology of Pollination*. Cambridge:  
386 Cambridge University Press.
- 387 **Cnaani, J., Schmidt, J. O. and Papaj, D. R.** (2003). The effect of octopamine on behavioral  
388 responses of free-foraging bumblebees to a change in food source profitability.  
389 *Naturwissenschaften* **90**, 185–188.
- 390 **Cook, C. N., Lawson, S. P., Brent, C. S. and Rehan, S. M.** (2019). Biogenic amines shift  
391 during the pre-reproductive to reproductive transition in the small carpenter bee, *Ceratina*  
392 *calcarata*. *Apidologie* **50**, 90–99.
- 393 **Corby-Harris, V., Deeter, M. E., Snyder, L., Meador, C., Welchert, A. C., Hoffman, A. and**  
394 **Obernesser, B. T.** (2020). Octopamine mobilizes lipids from honey bee (*Apis mellifera*)  
395 hypopharyngeal glands. *J. Exp. Biol.* **223**, jeb216135.
- 396 **Dornhaus, A., Brockmann, A. and Chittka, L.** (2003). Bumble bees alert to food with  
397 pheromone from tergal gland. *J. Comp. Physiol. A* **189**, 47–51.
- 398 **Farooqui, T.** (2013). A potential link among biogenic amines-based pesticides, learning and  
399 memory, and colony collapse disorder: A unique hypothesis. *Neurochem. Int.* **62**, 122–136.
- 400 **Fussnecker, B. L., Smith, B. H. and Mustard, J. A.** (2006). Octopamine and tyramine  
401 influence the behavioral profile of locomotor activity in the honey bee (*Apis mellifera*). *J.*

- 402 *Insect Physiol.* **52**, 1083–1092.
- 403 **Giray, T., Galindo-Cardona, A. and Oskay, D.** (2007). Octopamine influences honey bee  
404 foraging preference. *J. Insect Physiol.* **53**, 691–698.
- 405 **Giurfa, M.** (2006). Associative Learning: The Instructive Function of Biogenic Amines. *Curr.*  
406 *Biol.* **16**, R892–R895.
- 407 **Goulson, D.** (2003). *Bumblebees: Their Behaviour and Ecology*. Oxford, UK: OUP.
- 408 **Gowda, V. and Gronenberg, W.** (2019). Brain composition and scaling in social bee species  
409 differing in body size. *Apidologie* **50**, 779–792.
- 410 **Hammer, M. and Menzel, R.** (1998). Multiple sites of associative odor learning as revealed by  
411 local brain microinjections of octopamine in honeybees. *Learn. Mem.* **5**, 146–156.
- 412 **Harris, J. W. and Woodring, J.** (1992). Effects of stress, age, season, and source colony on  
413 levels of octopamine, dopamine and serotonin in the honey bee (*Apis mellifera L.*) brain. *J.*  
414 *Insect Physiol.* **38**, 29–35.
- 415 **Jeanson, R., Clark, R. M., Holbrook, C. T., Bertram, S. M., Fewell, J. H. and Kukuk, P. F.**  
416 (2008). Division of labour and socially induced changes in response thresholds in  
417 associations of solitary halictine bees. *Anim. Behav.* **76**, 593–602.
- 418 **Ji, Y., Li, X., Ji, T., Tang, J., Qiu, L., Hu, J., Dong, J., Luo, S., Liu, S., Frandsen, P. B., et al.**  
419 (2020). Gene reuse facilitates rapid radiation and independent adaptation to diverse habitats  
420 in the Asian honeybee. *Sci. Adv.* **6**, eabd3590.
- 421 **Lenth, R.**, 2017. Emmeans: Estimated marginal means, aka least-squares means. R Package  
422 version 1.0. <https://CRAN.R-project.org/package=emmeans>.

- 423 **Mayack, C., Natsopoulou, M. E. and McMahon, D. P.** (2015). *Nosema ceranae* alters a highly  
424 conserved hormonal stress pathway in honeybees. *Insect Mol. Biol.* **24**, 662–670.
- 425 **Mayack, C., Phalen, N., Carmichael, K., White, H. K., Hirche, F., Wang, Y., Stangl, G. I.**  
426 **and Amdam, G. V.** (2019). Appetite is correlated with octopamine and hemolymph sugar  
427 levels in forager honeybees. *J. Comp. Physiol. A* **205**, 609–617.
- 428 **Mc Cabe, S. I., Ferro, M. W. B., Farina, W. M. and Hrncir, M.** (2017). Dose- and time-  
429 dependent effects of oral octopamine treatments on the sucrose responsiveness in stingless  
430 bees (*Melipona scutellaris*). *Apidologie* **48**, 1–7.
- 431 **Menzel, R.** (2012). The honeybee as a model for understanding the basis of cognition. *Nat. Rev.*  
432 *Neurosci.* **13**, 758–768.
- 433 **Muth, F. and Leonard, A. S.** (2019). A neonicotinoid pesticide impairs foraging, but not  
434 learning, in free-flying bumblebees. *Sci. Rep.* **9**, 4764.
- 435 **Muth, F., Scampini, A. V. and Leonard, A. S.** (2015). The effects of acute stress on learning  
436 and memory in bumblebees. *Learn. Motiv.* **50**, 39–47.
- 437 **Muth, F., Cooper, T. R., Bonilla, R. F. and Leonard, A. S.** (2017). A novel protocol for  
438 studying bee cognition in the wild. *Methods Ecol. Evol.* **0**, 1–10.
- 439 **Muth, F., Philbin, C. S., Jeffrey, C. S. and Leonard, A. S.** (2022). Discovery of octopamine  
440 and tyramine in nectar and their effects on bee behavior. Accepted to *iScience*.
- 441 **Page Jr, R. E., Fondrk, M. K. and Erber, J.** (1998). The effect of genotype on response  
442 thresholds to sucrose and foraging behavior of honey bees (*Apis mellifera L.*). *J. Comp.*  
443 *Physiol. A Sensory, Neural, Behav. Physiol.* **182**, 489–500.

- 444 **Pankiw, T.** (2003). Directional change in a suite of foraging behaviors in tropical and temperate  
445 evolved honey bees (*Apis mellifera L.*). *Behav. Ecol. Sociobiol.* **54**, 458–464.
- 446 **Pankiw, T. and Page, R. E.** (2003). Effect of pheromones, hormones, and handling on sucrose  
447 response thresholds of honey bees (*Apis mellifera L.*). *J. Comp. Physiol. A* **189**, 675–684.
- 448 **Pankiw, T. and Page Jr., R. E.** (1999). The effect of genotype, age, sex, and caste on response  
449 thresholds to sucrose and foraging behavior of honey bees (*Apis mellifera L.*). *J. Comp.*  
450 *Physiol. A Sensory, Neural, Behav. Physiol.* **185**, 207–213.
- 451 **Papaefthimiou, C. and Theophilidis, G.** (2011). Octopamine—A single modulator with double  
452 action on the heart of two insect species (*Apis mellifera macedonica* and *Bactrocera oleae*):  
453 Acceleration vs. inhibition. *J. Insect Physiol.* **57**, 316–325.
- 454 **Papaefthimiou, C., Papachristoforou, A. and Theophilidis, G.** (2013). Biphasic responses of  
455 the honeybee heart to nanomolar concentrations of amitraz. *Pestic. Biochem. Physiol.* **107**,  
456 132–137.
- 457 **Peng, T., Schroeder, M. and Grüter, C.** (2020). Octopamine increases individual and  
458 collective foraging in a neotropical stingless bee: Effects of Octopamine in *Plebeia*  
459 *droryana*. *Biol. Lett.* **16**,.
- 460 **Peng, T., Derstroff, D., Maus, L., Bauer, T. and Grüter, C.** (2021). Forager age and foraging  
461 state, but not cumulative foraging activity, affect biogenic amine receptor gene expression  
462 in the honeybee mushroom bodies. *Genes, Brain Behav.* **20**, e12722.
- 463 **R Core Team** (2020). R: A language and environment for statistical computing. R Foundation  
464 for Statistical Computing, Vienna, Austria. URL <http://www.R-project.org/>.

- 465 **Reim, T. and Scheiner, R.** (2014). Division of labour in honey bees: age- and task-related  
466 changes in the expression of octopamine receptor genes. *Insect Mol. Biol.* **23**, 833–841.
- 467 **Rein, J., Mustard, J. A., Strauch, M., Smith, B. H. and Galizia, C. G.** (2013). Octopamine  
468 modulates activity of neural networks in the honey bee antennal lobe. *J. Comp. Physiol. A*  
469 **199**, 947–962.
- 470 **Riemensperger, T., Völler, T., Stock, P., Buchner, E. and Fiala, A.** (2005). Punishment  
471 Prediction by Dopaminergic Neurons in *Drosophila*. *Curr. Biol.* **15**, 1953–1960.
- 472 **Riveros, A. J. and Gronenberg, W.** (2009). Olfactory learning and memory in the bumblebee  
473 *Bombus occidentalis*. *Naturwissenschaften* **96**, 851–856.
- 474 **Riveros, A. J. and Gronenberg, W.** (2010). Sensory allometry, foraging task specialization and  
475 resource exploitation in honeybees. *Behav. Ecol. Sociobiol.* **64**, 955–966.
- 476 **Riveros, A. J., Leonard, A. S., Gronenberg, W. and Papaj, D. R.** (2020). Learning of bimodal  
477 vs. unimodal signals in restrained bumble bees. *J. Exp. Biol.*, **223**, jeb220103.
- 478 **Roeder, T.** (1994). Biogenic amines and their receptors in insects. *Comp. Biochem. Physiol. Part*  
479 *C Pharmacol. Toxicol. Endocrinol.* **107**, 1–12.
- 480 **Roeder, T.** (1999). Octopamine in invertebrates. *Prog. Neurobiol.* **59**, 533–561.
- 481 **Sasaki, K., Matsuyama, H., Morita, N. and Ono, M.** (2017). Caste differences in the  
482 association between dopamine and reproduction in the bumble bee *Bombus ignitus*. *J. Insect*  
483 *Physiol.* **103**, 107–116.
- 484 **Sasaki, K., Yokoi, K. and Toga, K.** (2021). Bumble bee queens activate dopamine production  
485 and gene expression in nutritional signaling pathways in the brain. *Sci. Rep.* **11**, 5526.

- 486 **Scheiner, R., Page, R. E. and Erber, J.** (2001). The Effects of Genotype, Foraging Role, and  
487 Sucrose Responsiveness on the Tactile Learning Performance of Honey Bees (*Apis*  
488 *mellifera* L.). *Neurobiol. Learn. Mem.* **76**, 138–150.
- 489 **Scheiner, R., Plückerhahn, S., Öney, B., Blenau, W. and Erber, J.** (2002). Behavioural  
490 pharmacology of octopamine, tyramine and dopamine in honey bees. *Behav. Brain Res.*  
491 **136**, 545–553.
- 492 **Scheiner, R., Toteva, A., Reim, T., Šāvik, E. and Barron, A. B.** (2014). Differences in the  
493 phototaxis of pollen and nectar foraging honey bees are related to their octopamine brain  
494 titers. *Front. Physiol.* **5**,.
- 495 **Schilcher, F., Thamm, M., Strube-Bloss, M. and Scheiner, R.** (2021). Opposing Actions of  
496 Octopamine and Tyramine on Honeybee Vision. *Biomolecules* **11**, 1374.
- 497 **Schulz, D. J. and Robinson, G. E.** (2001). Octopamine influences division of labor in honey  
498 bee colonies. *J. Comp. Physiol. A Sensory, Neural, Behav. Physiol.* **187**, 53–61.
- 499 **Schulz, D. J., Barron, A. B. and Robinson, G. E.** (2002). A Role for Octopamine in Honey Bee  
500 Division of Labor. *Brain. Behav. Evol.* **60**, 350–359.
- 501 **Schwaerzel, M., Monastirioti, M., Scholz, H., Friggi-Grelin, F., Birman, S. and Heisenberg,**  
502 **M.** (2003). Dopamine and Octopamine Differentiate between Aversive and Appetitive  
503 Olfactory Memories in *Drosophila*. *J. Neurosci.* **23**, 10495–10502.
- 504 **Sherry, D. F. and Strang, C. G.** (2015). Contrasting styles in cognition and behaviour in  
505 bumblebees and honeybees. *Behav. Processes* **117**, 59–69.
- 506 **Smith, A. R., Simons, M., Bazarko, V., Harach, J. and Seid, M. A.** (2019). Queen–worker



- 507 aggression in the facultatively eusocial bee *Megalopta genalis*. *Insectes Soc.* **66**, 479–490.
- 508 **Søvik, E., Perry, C. J., LaMora, A., Barron, A. B. and Ben-Shahar, Y.** (2015). Negative  
509 impact of manganese on honeybee foraging. *Biol. Lett.* **11**, 20140989.
- 510 **Spivak, M., Masterman, R., Ross, R. and Mesce, K. A.** (2003). Hygienic behavior in the  
511 honey bee (*Apis mellifera* L.) and the modulatory role of octopamine. *J. Neurobiol.* **55**,  
512 341–354.
- 513 **Thamm, M., Wagler, K., Brockmann, A. and Scheiner, R.** (2021). Tyramine 1 Receptor  
514 Distribution in the Brain of Corbiculate Bees Points to a Conserved Function. *Brain. Behav.*  
515 *Evol.* **96**, 13–25.
- 516 **Unoki, S., Matsumoto, Y. and Mizunami, M.** (2005). Participation of octopaminergic reward  
517 system and dopaminergic punishment system in insect olfactory learning revealed by  
518 pharmacological study. *Eur. J. Neurosci.* **22**, 1409–1416.
- 519 **Wagener-Hulme, C., Kuehn, J. C., Schulz, D. J. and Robinson, G. E.** (1999). Biogenic  
520 amines and division of labor in honey bee colonies. *J. Comp. Physiol. A Sensory, Neural,*  
521 *Behav. Physiol.* **184**, 471–479.
- 522 **Wallberg, A., Schöning, C., Webster, M. T. and Hasselmann, M.** (2017). Two extended  
523 haplotype blocks are associated with adaptation to high altitude habitats in East African  
524 honey bees. *PLOS Genet.* **13**, e1006792.
- 525 **Wise, R. A.** (2004). Dopamine, learning and motivation. *Nat. Rev. Neurosci.* **5**, 483–494.
- 526
- 527

528 **Statements and Declarations**

529 **Funding**

530 This work was supported by the National Science Foundation IOS-1755096 (ASL) and IOS-  
531 2028613 (FM).

532

533 **Competing Interests**

534 The authors have no relevant financial or non-financial interests to disclose.

535

536 **Author Contributions**

537 ASL conceived of the experiments; experimental design was planned with input from EB and  
538 FM. EB collected the data. FM analyzed the data and co-wrote the manuscript with ASL. All  
539 authors read and approved the final manuscript.

540

541 **Ethics Approval**

542 While no ethical approval was needed we aimed to minimize potential suffering to bees through  
543 cold-immobilizing them prior to placing them in harnesses for the experimental protocol. Bees  
544 were euthanized via freezing.

545

546

547 **Figure Captions**

548 **Figure 1:** Summary of studies from a 2022 Web of Science search of the scientific literature for  
549 "octopamine + bee". Color indicates bee family; Apidae and specifically *Apis mellifera* are  
550 greatly over-represented in the literature compared to other bee families.

551 **Figure 2:** A diagram of the Proboscis Extension Response (PER) a) training apparatus and b)  
552 training protocol used in Experiment 2.

553 **Figure 3:** OA effects on bumble bee sucrose responsiveness (Experiment 1). When bees were  
554 pre-fed OA of two doses, a) sucrose responsiveness increased at the higher, but not lower, dose  
555 and b) initial responsiveness to water was higher in the high OA-treated group.

556 **Figure 4:** OA effects on bumble bee learning (Experiment 2). a) Bumble bees pre-fed a high  
557 dose of OA were more responsive to the conditioned stimulus than a control group; dashed line  
558 indicates where motivation to respond dropped across both treatments. b) The proportion of bees  
559 responding to the sucrose reward was higher in the OA-fed group than the control group.

560

561

562 **Figures**

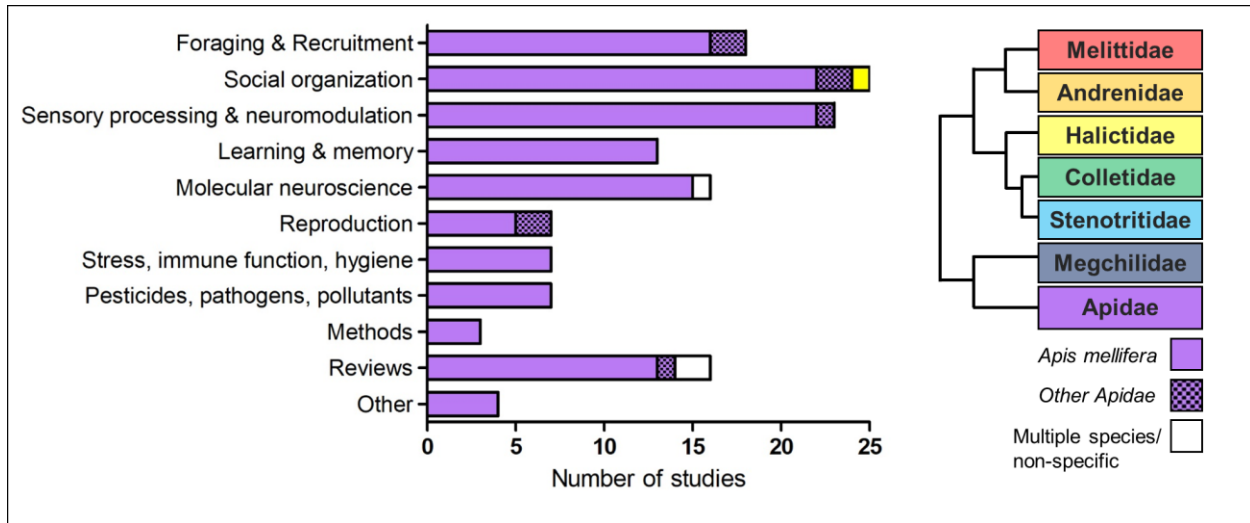

563

564 **Figure 1:** Summary of studies from a 2022 Web of Science search of the scientific literature for  
565 "octopamine + bee". Color indicates bee family; Apidae and specifically *Apis mellifera* are  
566 greatly over-represented in the literature compared to other bee families.

567

568

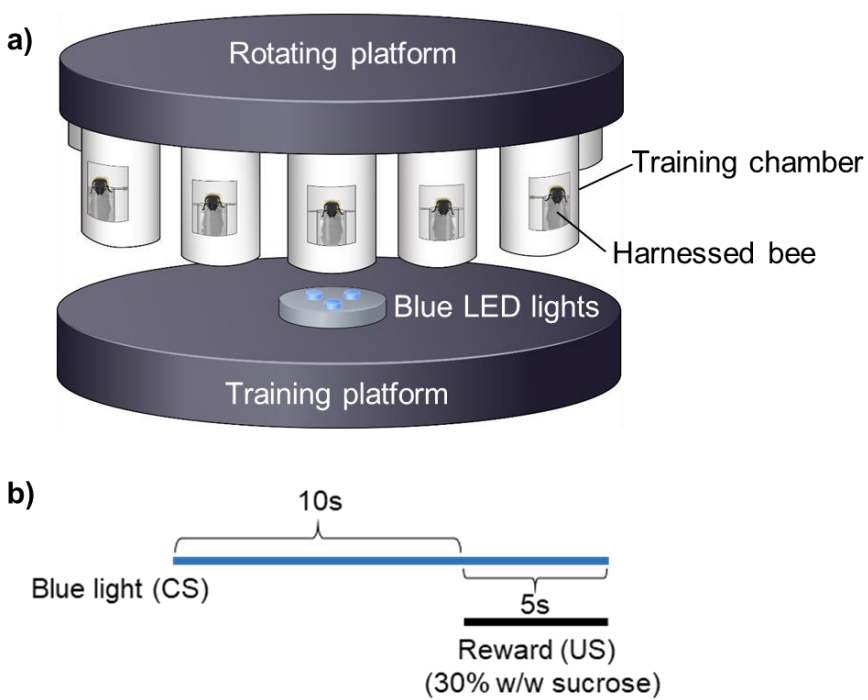

569

570 **Figure 2:** A diagram of the Proboscis Extension Response (PER) a) training apparatus and b)

571 training protocol used in Experiment 2.

572

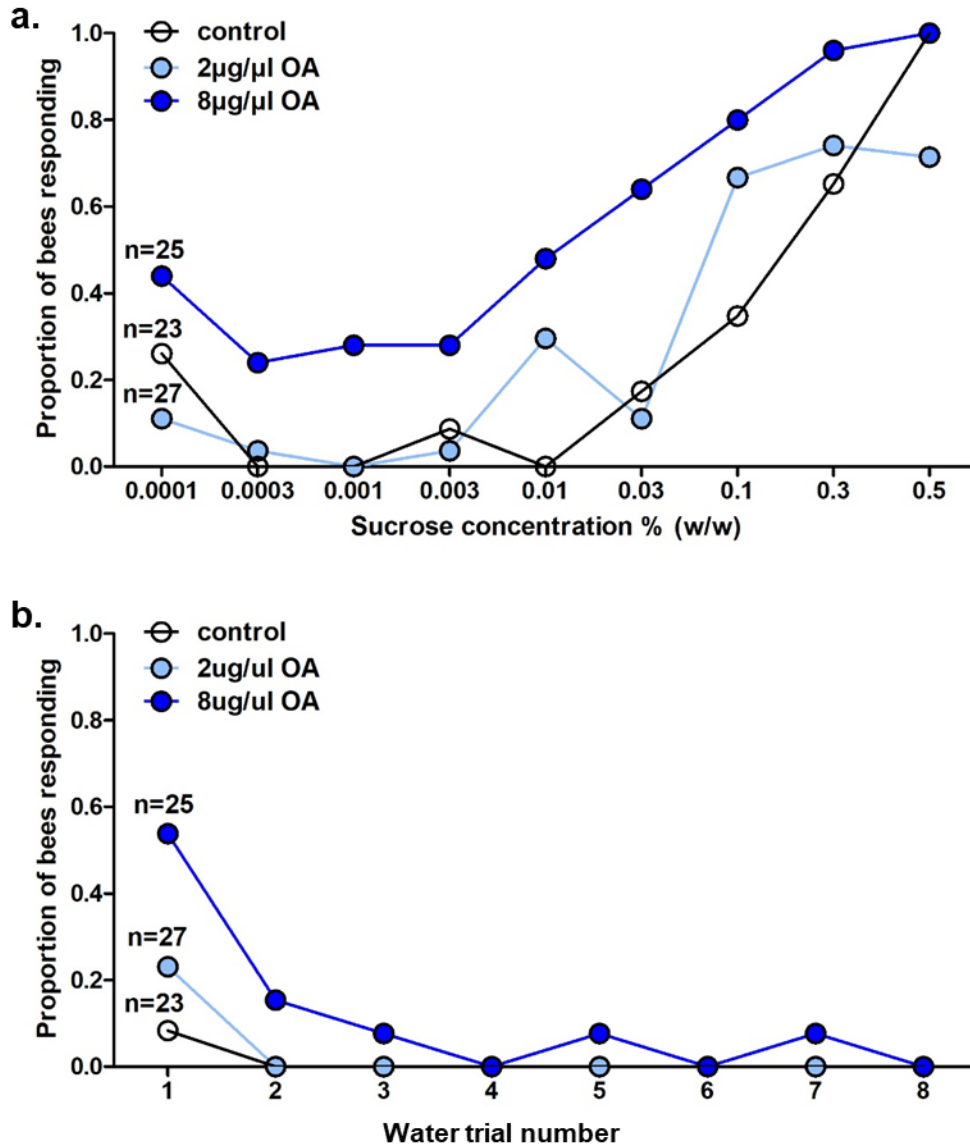

573

574 **Figure 3:** OA effects on bumble bee sucrose responsiveness (Experiment 1). When bees were  
575 pre-fed OA of two doses, a) sucrose responsiveness increased at the higher, but not lower, dose  
576 and b) initial responsiveness to water was higher in the high OA-treated group.

577

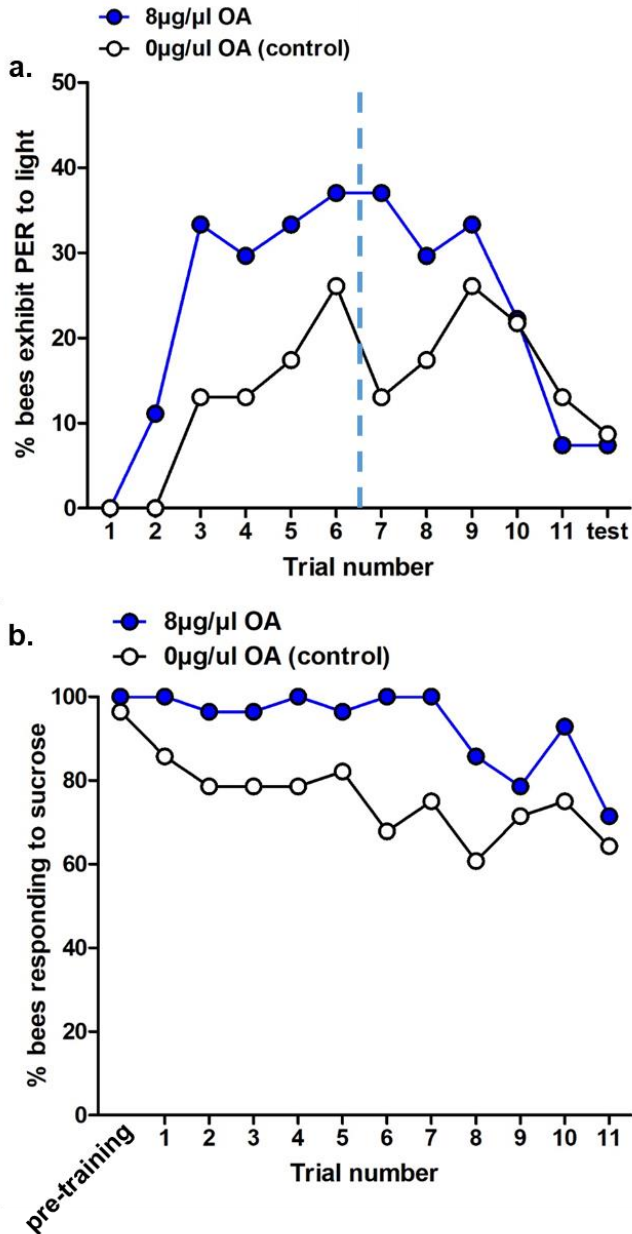

578

579 **Figure 4:** OA effects on bumble bee learning (Experiment 2). a) Bumble bees pre-fed a high  
580 dose of OA were more responsive to the conditioned stimulus than a control group; dashed line  
581 indicates where motivation to respond dropped across both treatments. b) The proportion of bees  
582 responding to the sucrose reward was higher in the OA-fed group than the control group.

583
